# Supplementary material for: Altered lipid homeostasis in Drosophila InsP3 receptor mutants leads to obesity and hyperphagia
Source: PubMed Central journal article supplement — Dis Model Mech. 2013 Feb 8;6(3):734–44. doi: 10.1242/dmm.010017 (PMC3634656; doi:10.1242/dmm.010017), 2013-02-08
Supplement: supp_010017_DMM010017.pdf [file supp_010017_DMM010017.pdf]

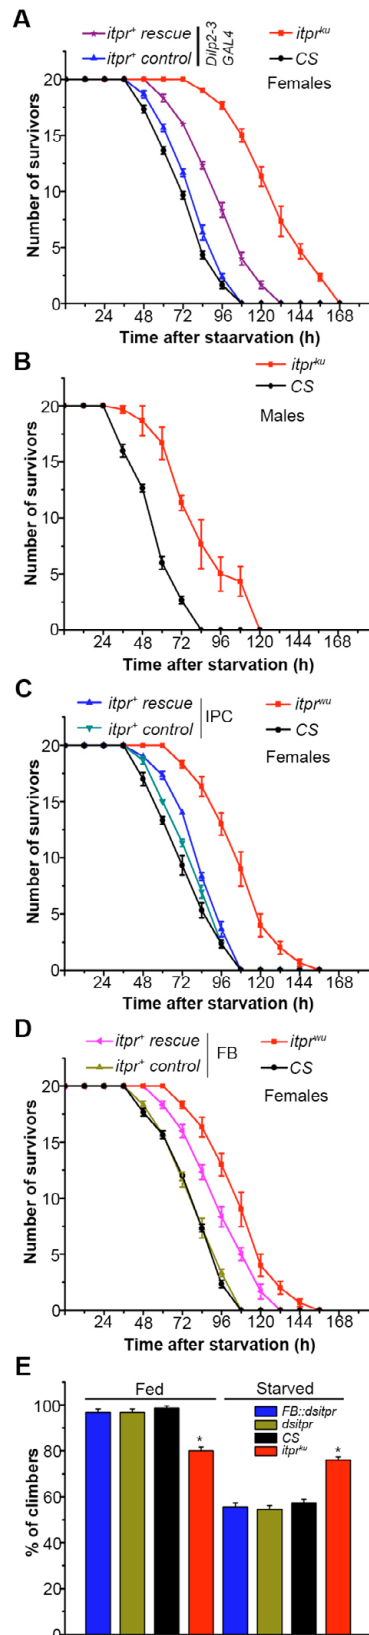

**Fig. S1. Stored lipids, starvation resistance and motor activity of *itpr* mutants and tissue-specific *itpr* RNAi knock-downs.** (A) Viability profile of *itpr<sup>ku</sup>* females after rescue by expression of *itpr<sup>+</sup>* through an alternate and independent *Dilp2-GAL4* construct referred to as *Dilp2-3GAL4* (Ikeya et al., 2002). (B) Viability profile of *Drosophila* males of the indicated genotypes upon starvation. (C,D) Viability profiles of *Drosophila* females of a second viable allelic *itpr* mutant combination (*itpr<sup>wc703/ug3</sup>*) upon starvation. (C) *itpr<sup>wc703/ug3</sup>* (*itpr<sup>wu</sup>*) females were resistant to starvation and this phenotype could be rescued by expression of an *itpr<sup>+</sup>* cDNA in the IPCs. (D) A partial rescue of starvation was observed by expression of the *itpr<sup>+</sup>* cDNA in the fat body. (E) Quantification of the motor ability of indicated genotypes by measuring their climbing ability. The climbing ability of *itpr<sup>ku</sup>* females was reduced compared to *CS* under fed conditions (\* $P < 0.001$ ; Student's *t*-test) but increased upon starvation (\* $P < 0.001$ ; Student's *t*-test). Climbing ability of flies with knock-down of *itpr* in the fat bodies was similar to *CS*.

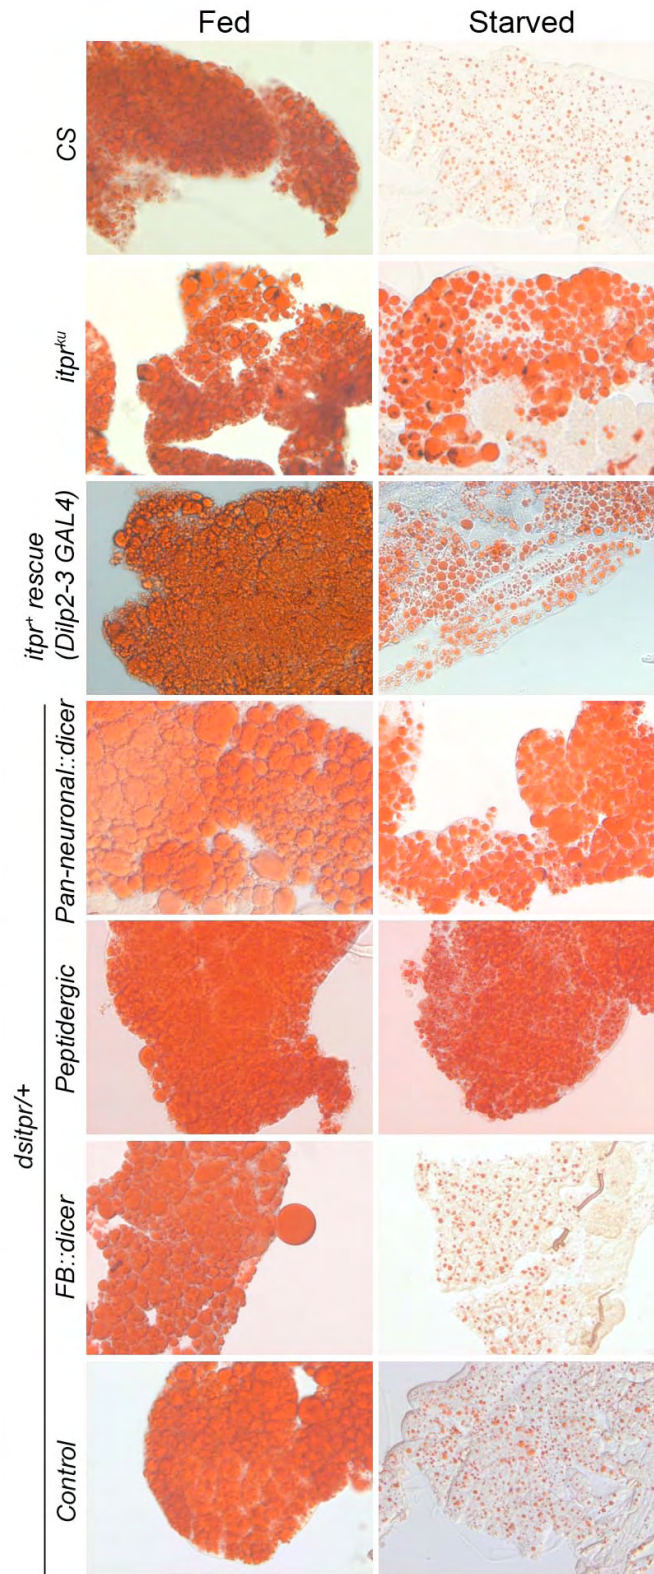

**Fig. S2. Stored lipids in abdominal fat body cells of *itpr* mutants and tissue-specific *itpr* RNAi knock-downs.** Oil Red O stained lipid droplets in fat body dissected from fed and starved adult females of the following genotypes: *CS* (wild-type), *itpr<sup>ku</sup>*, *itpr<sup>+</sup>* rescue of *itpr<sup>ku</sup>* with *Dilp2-3GAL4* (*UASitpr<sup>+</sup>/+*; *+/+*; *itpr<sup>ka1091</sup>/itpr<sup>tg3</sup>*, *Dilp2-3GAL4*), knock-down of *itpr* by *dsitpr* in the indicated cellular domains and the control (*dsitpr/+*). The *GAL4* drivers used were Pan-neuronal, *Elav<sup>C155</sup>GAL4*; Peptidergic neurons, *dimmGAL4* and Fat body, *C729GAL4*. Stored lipids remain high after starvation in *itpr<sup>ku</sup>* and in the strain with pan-neuronal and peptidergic neuron knock down of *dsitpr*, as compared to knock down of *itpr* in fat bodies, controls and *CS*.

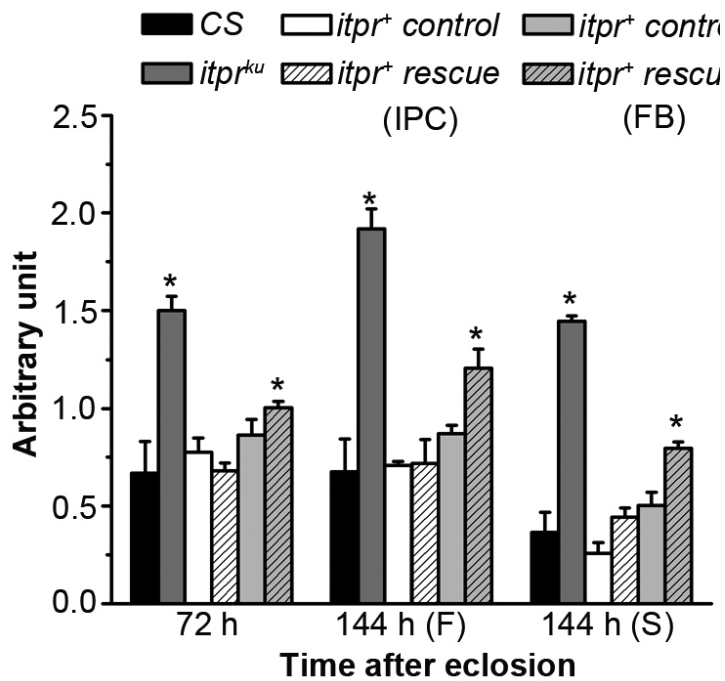

**Fig. S3. Quantification of TAGs by densitometric analysis of the TAG bands after thin-layer chromatography, in the indicated genotypes.**

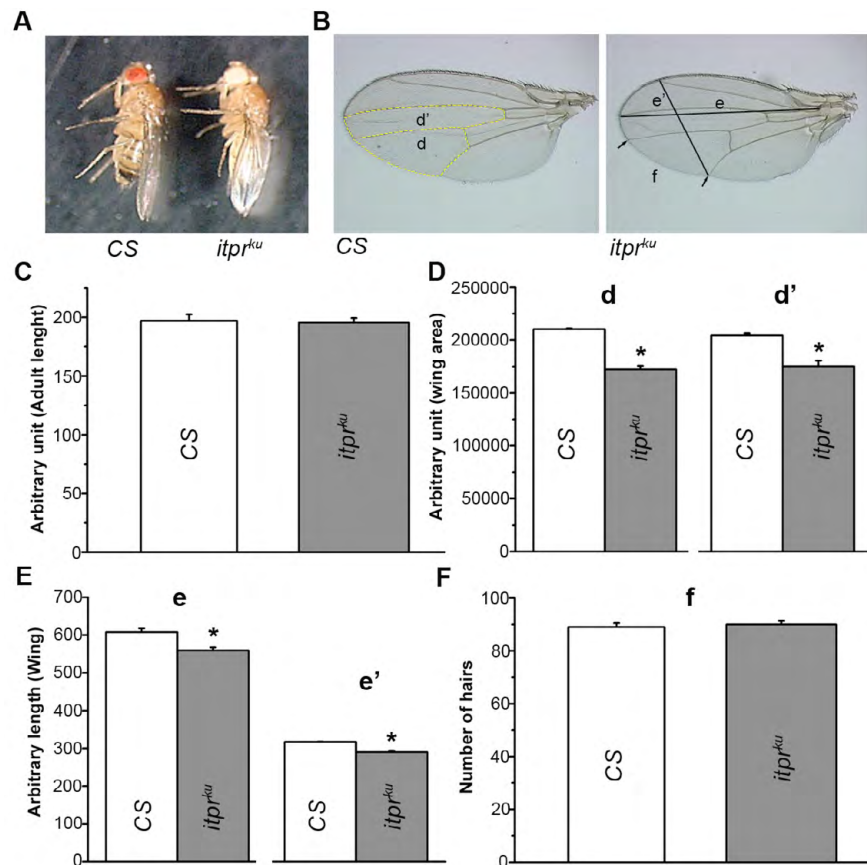

**Fig. S4. Size measurements of *itpr*<sup>ku</sup> females reveal a small but significant reduction in growth.** (A) Representative females of the indicated genotypes 24-48 hours after eclosion. (B) Representative photographs of dissected wings from adult females of the indicated genotypes. (C) Mean body length calculated from photographs of three females each of the indicated genotypes. (D) Mean area of the regions marked as d and d' in B above. The mean area is significantly reduced in wings from *itpr*<sup>ku</sup> females as compared with the same region in CS ( $P < 0.005$ ; Student's *t* test). (E) Mean length of wings across e and e' as indicated in B above. *itpr*<sup>ku</sup> length is significantly lower than CS ( $P < 0.005$ ; Student's *t*-test). (F) Number of sensory hairs at the wing margin in the region marked as f in B above. No difference was observed in the number of hairs at the wing margin between wild-type (CS) and mutant (*itpr*<sup>ku</sup>).

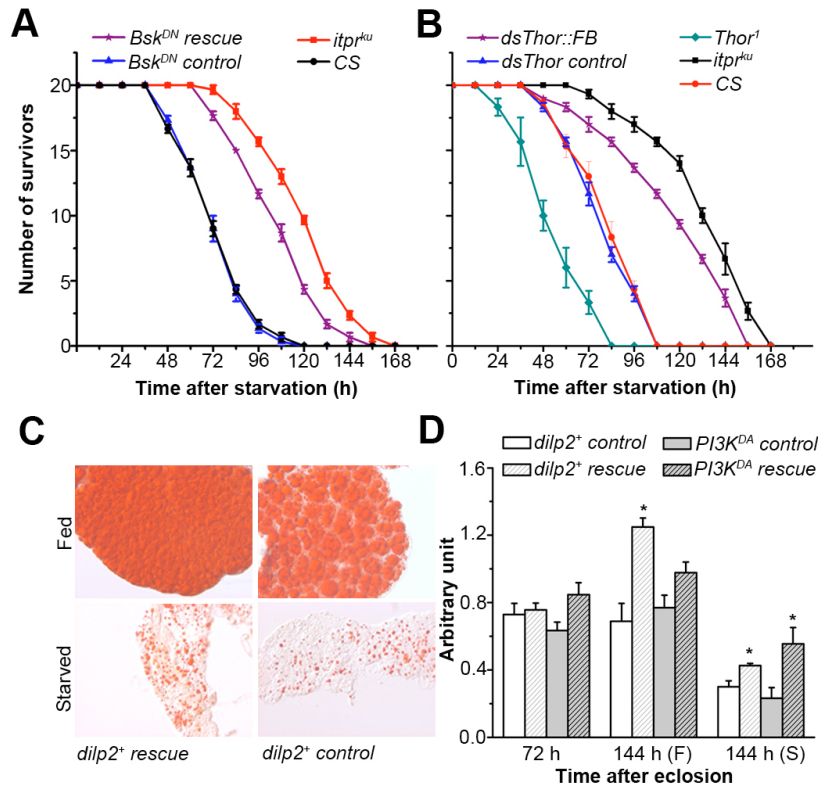

**Fig. S5. Raised insulin-signaling reduces starvation resistance in *itpr<sup>ku</sup>*.** (A) Viability profile of *itpr<sup>ku</sup>* females expressing a Jun-N-terminal Kinase (JNK) dominant negative (*Bsk<sup>DN</sup>*) transgene in the IPCs. JNK is reported to reduce ILP transcription in the IPCs under stress. (B) Reduction of d4E-BP by expression of an RNAi construct (*dsThor*), partially rescues starvation resistance in *itpr<sup>ku</sup>*. *Thor* transcripts are normally downregulated by insulin signaling. (C,D) Expression of a *dilp2<sup>+</sup>* transgene in IPCs rescued TAG levels in the FB on starvation as observed by Oil Red-O staining (C) and (D) by densitometric quantification of TAG bands from a Thin Layer Chromatography plate. Similarly expression of a *PI3K<sup>DA</sup>* transgene in the FB partially rescued TAG levels; \* $P < 0.05$  as compared with controls at the same time points.

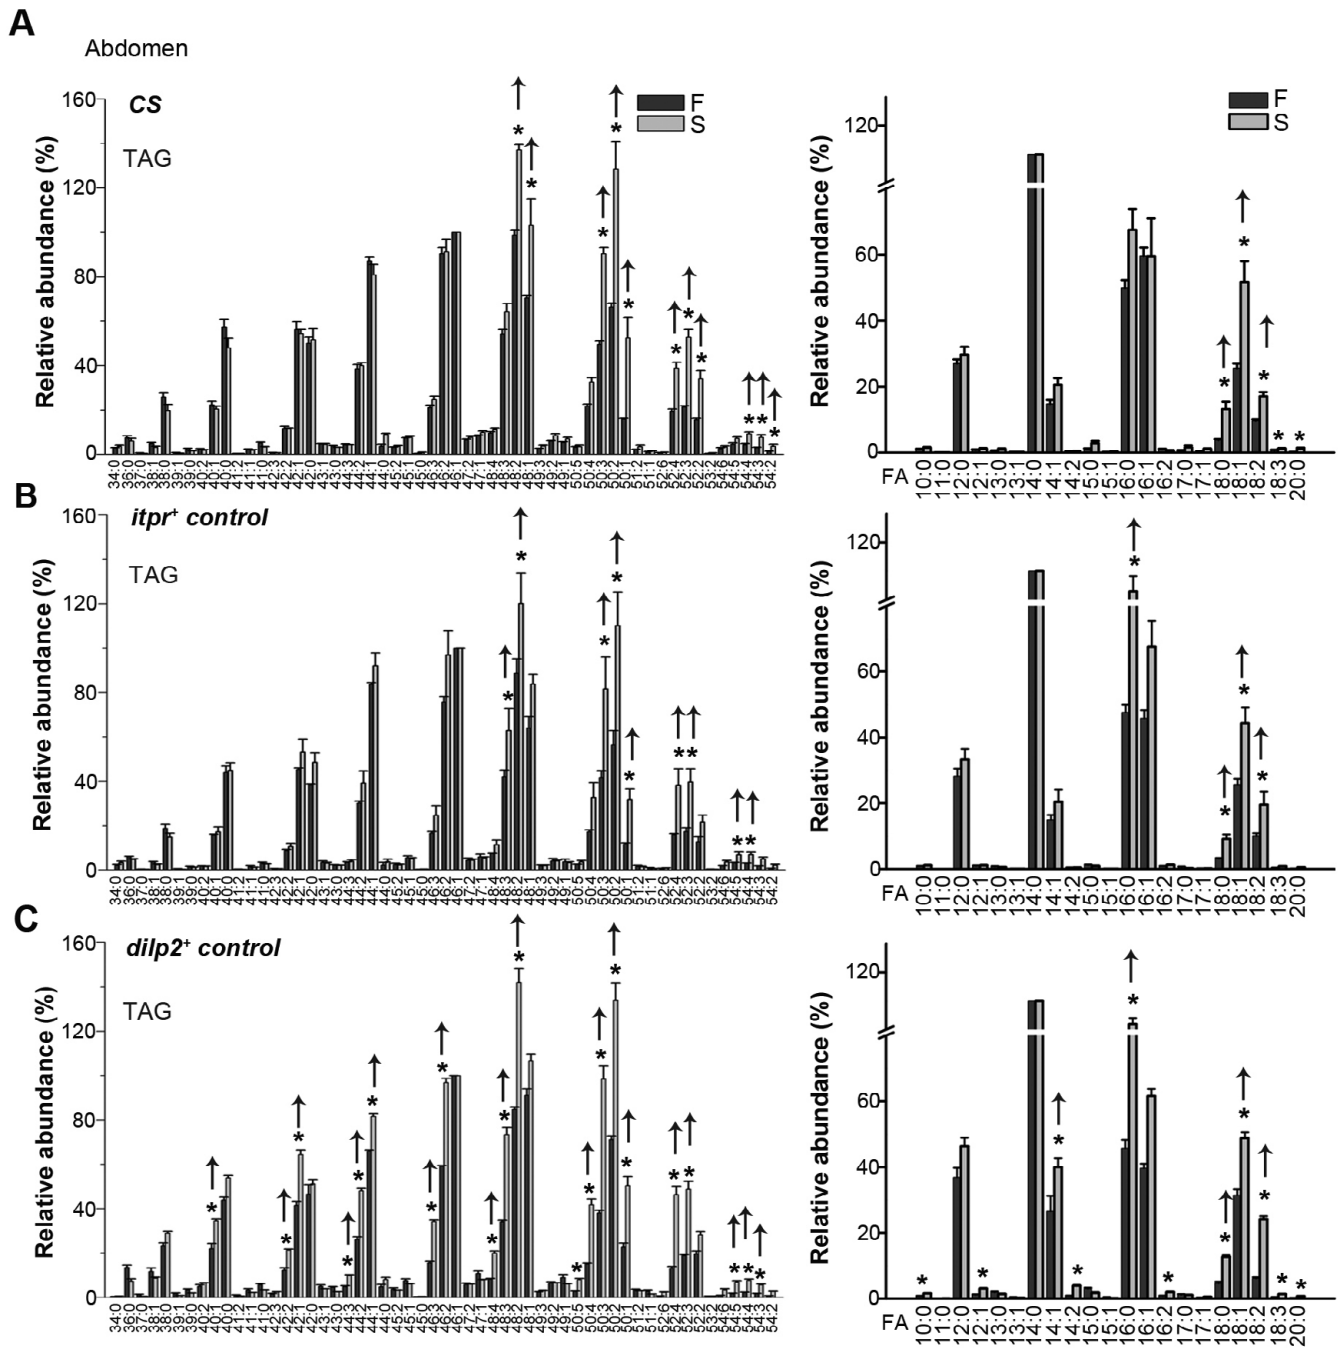

**Fig. S6. Comparison of TAGs and fatty acids in fed and starved conditions between wild-type and controls of *itpr<sup>+</sup>* and *dilp2<sup>+</sup>* transgenes. (A) CS flies as in Fig. 6A. (B) TAG and fatty acid profiles of *itpr<sup>+</sup>* control flies are similar to wild-type (\* $P < 0.05$ , ANOVA, post-hoc bonferroni test between fed and starved conditions). (C) The relative abundance of multiple TAG and fatty acid species increases in comparison to the major TAG (46:1) and fatty acid (14:0) respectively in starved *dilp2<sup>+</sup>* control flies.**

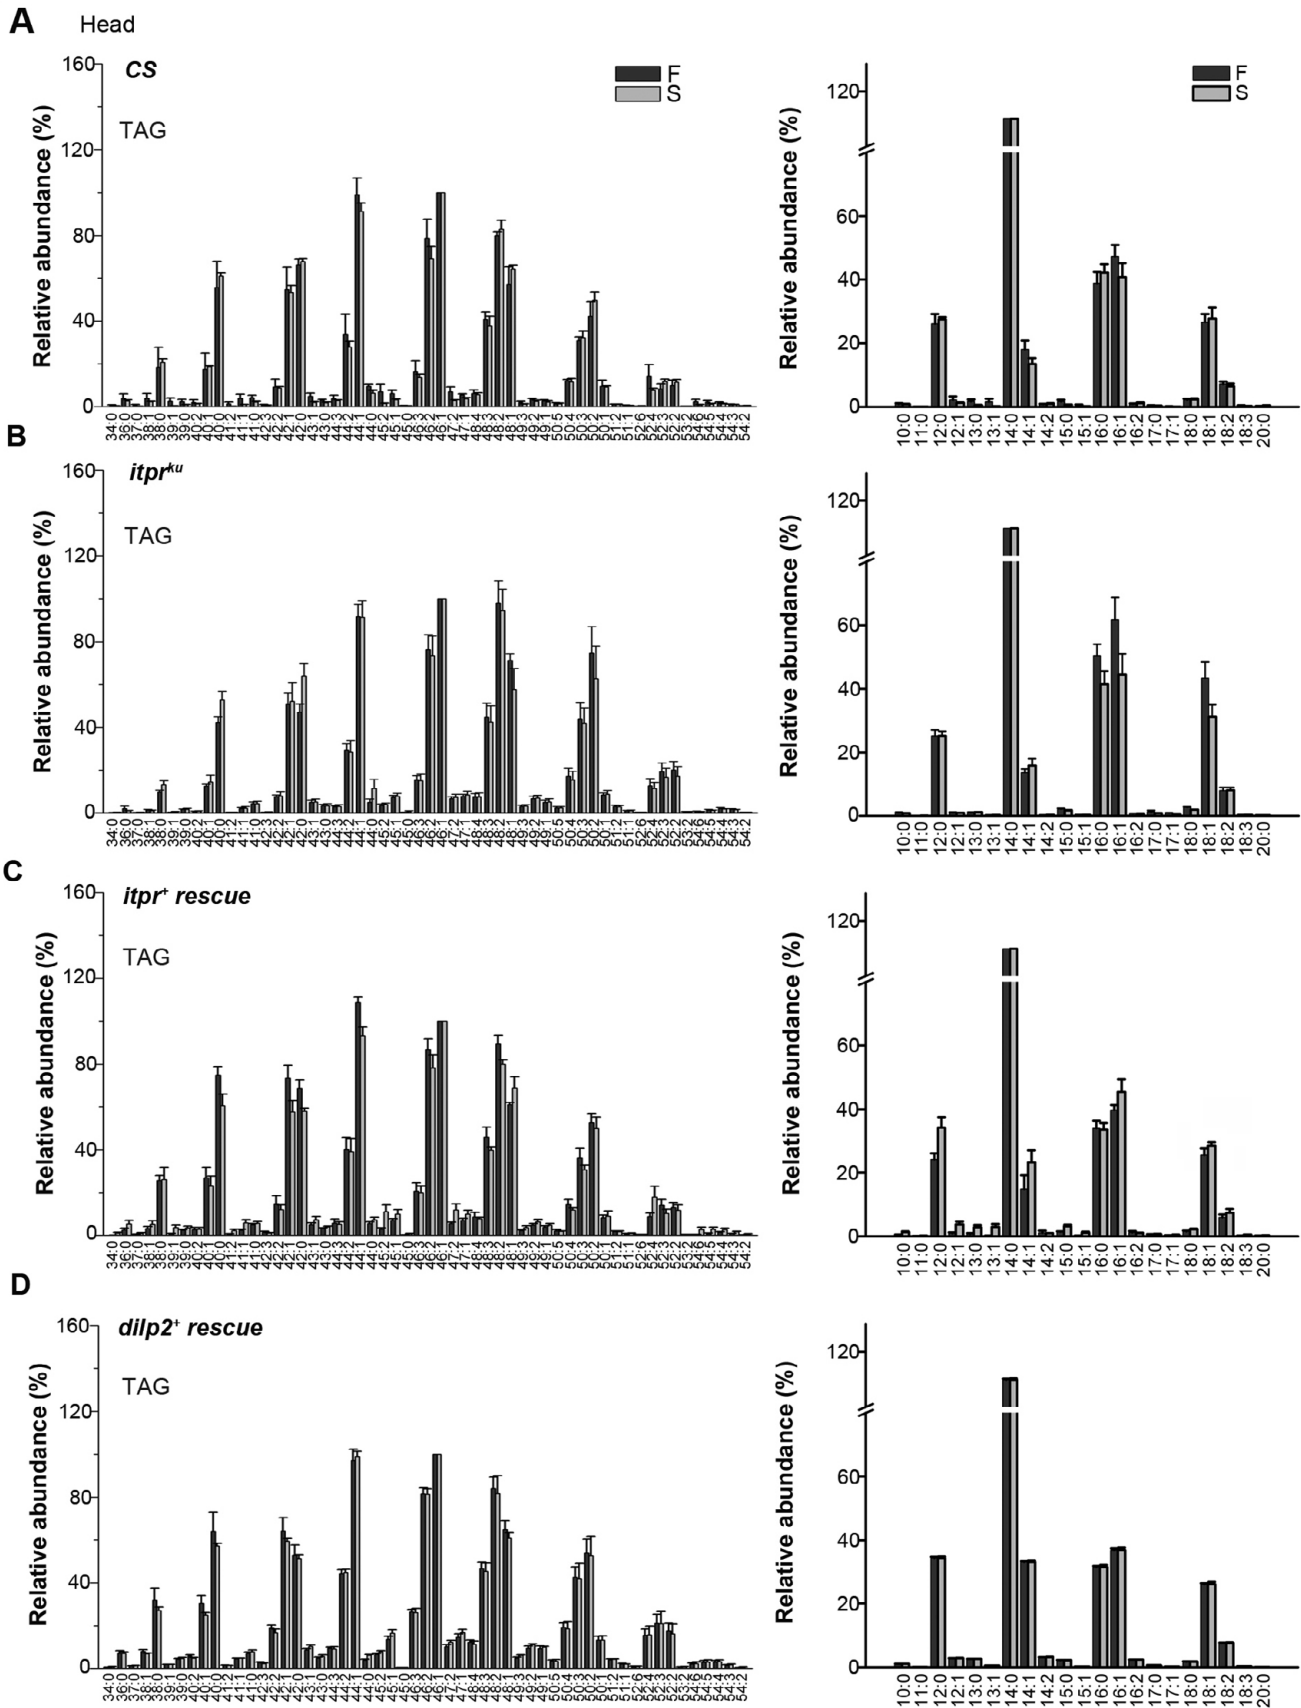

**Fig. S7. Utilization of short chain and long chain TAGs under starvation is identical in the head.** (A-D) TAG and fatty acid profiles from heads of the indicated genotypes. Utilization of long and short chain TAGs and their constituent fatty acids appears similar in all genotypes upon starvation. All TAG levels were normalized to the most abundant TAG 46:1 which was taken as 100%. Similarly, fatty acids were normalized to FA 14:0.



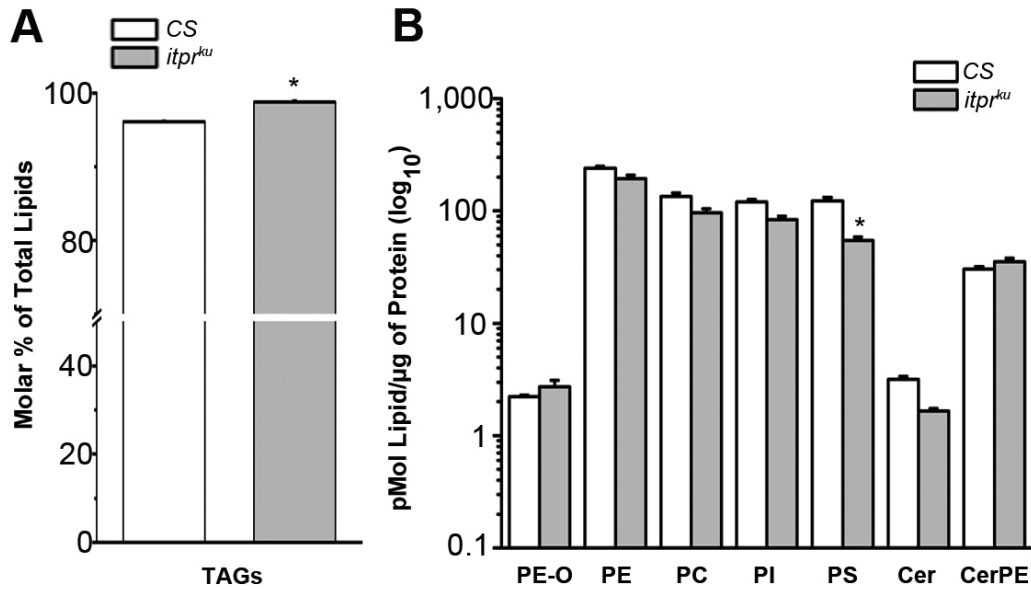

**Fig. S8. (A) Measurement of TAGs in 12 hour pupae obtained from larvae.** Molar percent of TAGs in total lipids of *itpr<sup>ku</sup>* was higher than CS (\* $P < 0.005$ , ANOVA, post-hoc Bonferroni test). (B) Measurement of the indicated membrane lipids in 12 hour pupae as a ratio of total protein. The ratio of individual total membrane lipid classes to total protein in *itpr<sup>ku</sup>* was not significantly different from CS under the same nutrient conditions, except for PS (\* $P < 0.05$ , ANOVA, post-hoc Bonferroni test).

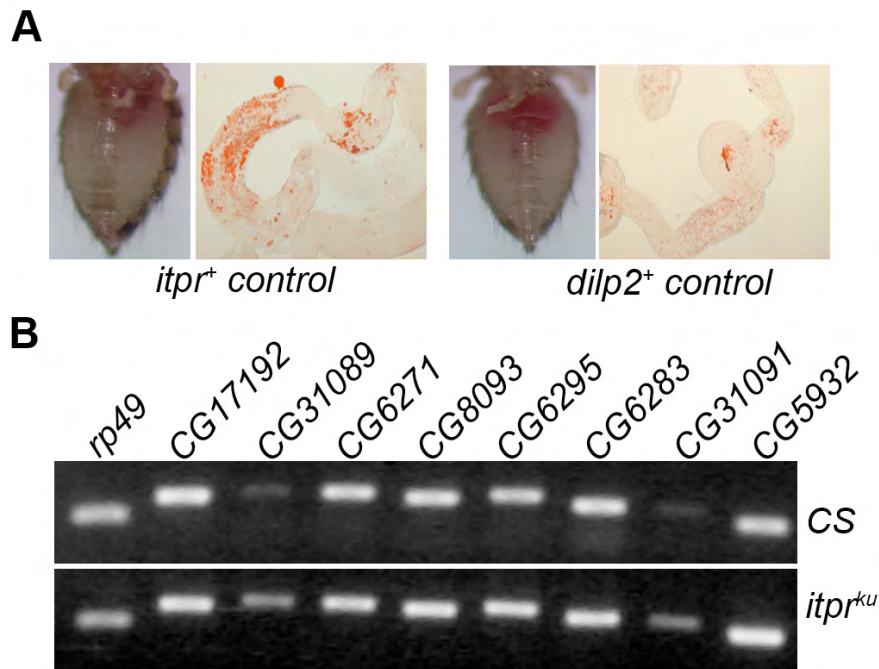

**Fig. S9. (A) Overexpression of *itpr<sup>+</sup>* and *dilp2<sup>+</sup>* in the IPCs of wild-type *Drosophila* does not affect feeding and TAG deposits in the mid-gut.** (B) Reverse transcription and polymerase chain reaction (RT-PCR) products of a control gene (*rp49*) and selected mid-gut lipase encoding genes from mid-gut RNA isolated from CS and *itpr<sup>ku</sup>*.

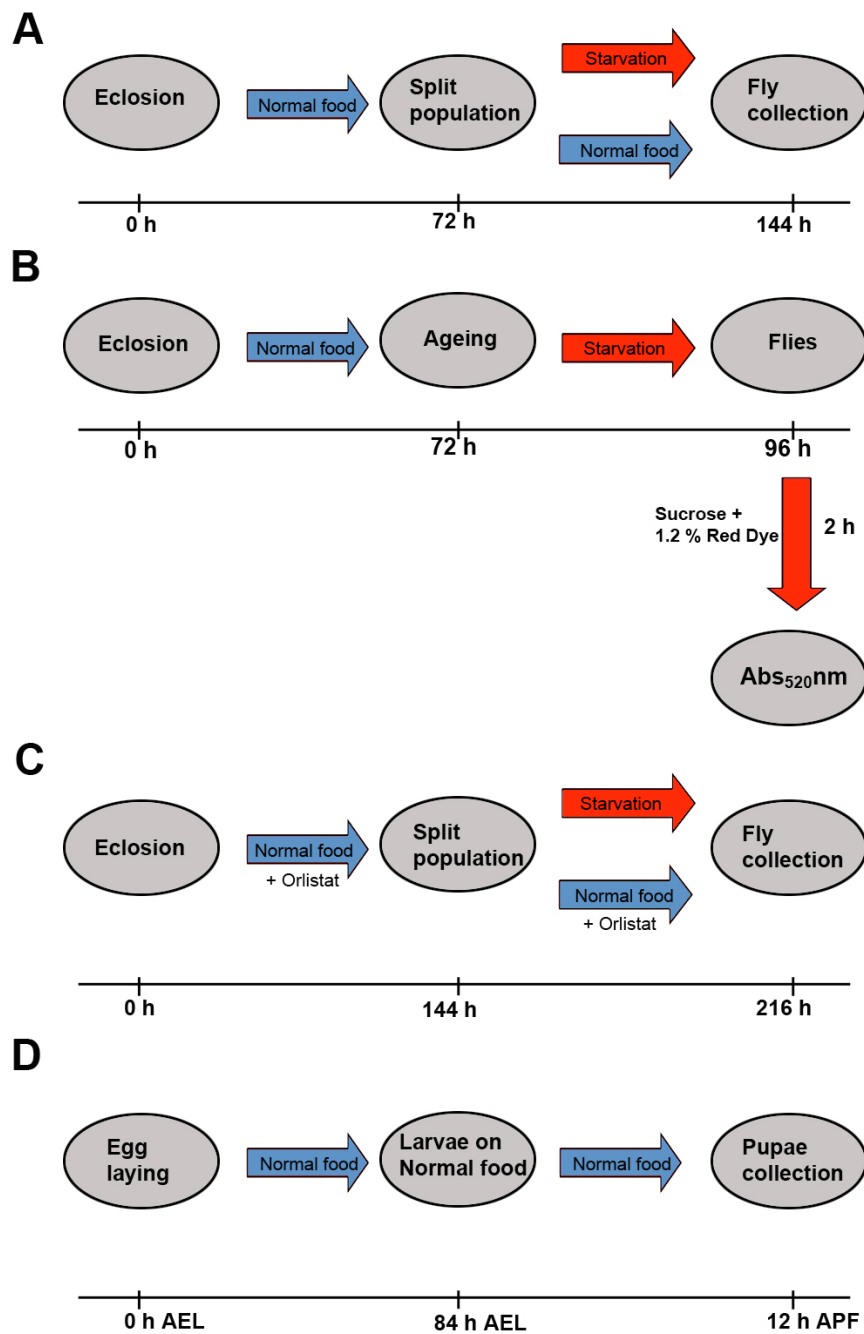

**Fig. S10. Schematic of starvation assays conducted under different nutritional conditions.** Protocol (A) was followed in experiments for Figs 1, 2, 3, 5, 6, [supplementary material](#) Figs S1, S2, S3, S5, S6, S7. Protocol (B) was followed for Fig. 8A,B, and [supplementary material](#) Fig. S9A. Protocol (C) was followed in Fig. 9A-C. Protocol (D) was followed in Fig. 7 and [supplementary material](#) Fig. S7.

**Table S1. Quantification of lipids from *Drosophila* pupae by shotgun lipidomics.** All lipids were obtained from pupae following the protocol in [supplementary material](#) Fig. S10D. Total lipids were quantified on the basis of pMol lipid/pMol of total TAG and pMol lipid/ $\mu$ g of protein. TAGs were quantified as pMol TAG/ $\mu$ g of protein and by molar % to total lipids.



| Quantification based on the pMol lipid/pMol of total TAG |                     |             |                    |                   |         |                                         |         |
|----------------------------------------------------------|---------------------|-------------|--------------------|-------------------|---------|-----------------------------------------|---------|
| m/z measured                                             | Chemical formula    | Error (ppm) | Assignment         | CS on Normal food |         | <i>itpr<sup>ku</sup></i> on Normal food |         |
|                                                          |                     |             |                    | Average           | SEM     | Average                                 | SEM     |
| <b>Phosphatidylethyleneamine</b>                         |                     |             |                    |                   |         |                                         |         |
| 698.5129                                                 | C39 H73 O7 N1<br>P1 | -0.12ppm    | <b>PE-O [34:3]</b> | 1.51E-05          | 3.8E-06 | 4.86E-06                                | 7.6E-07 |
| 716.5607                                                 | C40 H79 O7 N1<br>P1 | 0.98ppm     | <b>PE-O [35:1]</b> | 3.59E-06          | 4.7E-07 | 1.23E-06                                | 1.1E-07 |
| 726.5437                                                 | C41 H77 O7 N1<br>P1 | -0.82ppm    | <b>PE-O [36:3]</b> | 4.91E-05          | 3.0E-06 | 1.06E-05                                | 3.7E-06 |
| 728.5594                                                 | C41 H79 O7 N1<br>P1 | -0.78ppm    | <b>PE-O [36:2]</b> | 4.19E-05          | 2.6E-06 | 1.02E-05                                | 3.6E-06 |
| 730.575                                                  | C41 H81 O7 N1<br>P1 | -0.86ppm    | <b>PE-O [36:1]</b> | 1.06E-05          | 4.8E-07 | 2.09E-06                                | 9.2E-07 |
|                                                          |                     |             | <b>Total-PE-O</b>  | 1.37E-04          | 3.6E-06 | 4.05E-05                                | 1.4E-05 |
| <b>Phosphatidylethanolamine</b>                          |                     |             |                    |                   |         |                                         |         |
| 632.429435                                               | C33 H63 O8 N1<br>P1 | -0.39ppm    | <b>PE [28:1]</b>   | 1.25E-05          | 9.9E-07 | 2.47E-06                                | 7.7E-08 |
| 634.445112                                               | C33 H65 O8 N1<br>P1 | -0.34ppm    | <b>PE [28:0]</b>   | 1.54E-05          | 7.1E-07 | 3.71E-06                                | 9.3E-07 |
| 658.444994                                               | C35 H65 O8 N1<br>P1 | -0.51ppm    | <b>PE [30:2]</b>   | 9.04E-06          | 1.5E-07 | 1.90E-06                                | 8.3E-08 |
| 660.460958                                               | C35 H67 O8 N1<br>P1 | -0.03ppm    | <b>PE [30:1]</b>   | 2.68E-04          | 1.0E-05 | 5.64E-05                                | 2.7E-06 |
| 662.476303                                               | C35 H69 O8 N1<br>P1 | -0.49ppm    | <b>PE [30:0]</b>   | 4.22E-05          | 1.4E-06 | 9.84E-06                                | 2.9E-06 |
| 676.492024                                               | C36 H71 O8 N1       | -0.38ppm    | <b>PE [31:0]</b>   | 7.34E-06          | 1.4E-06 | 1.68E-06                                | 1.1E-06 |

|            |                     |          |                  |          |         |          |         |
|------------|---------------------|----------|------------------|----------|---------|----------|---------|
|            | P1                  | m        |                  | 06       | 06      |          | 07      |
| 684.46111  | C37 H67 O8 N1<br>P1 | 0.19ppm  | <b>PE [32:3]</b> | 3.35E-05 | 1.5E-06 | 8.91E-06 | 1.2E-06 |
| 686.476808 | C37 H69 O8 N1<br>P1 | 0.26ppm  | <b>PE [32:2]</b> | 8.34E-04 | 4.4E-05 | 1.80E-04 | 2.3E-05 |
| 688.492252 | C37 H71 O8 N1<br>P1 | -0.04ppm | <b>PE [32:1]</b> | 1.59E-03 | 5.5E-05 | 3.29E-04 | 6.4E-05 |
| 690.506886 | C37 H73 O8 N1<br>P1 | -1.51ppm | <b>PE [32:0]</b> | 5.52E-06 | 1.4E-06 | 2.21E-06 | 1.5E-06 |
| 698.47496  | C38 H69 O8 N1<br>P1 | -2.39ppm | <b>PE [33:3]</b> | 3.02E-06 | 8.4E-08 | 9.50E-07 | 5.2E-08 |
| 700.49226  | C38 H71 O8 N1<br>P1 | -0.03ppm | <b>PE [33:2]</b> | 3.57E-05 | 2.1E-06 | 9.73E-06 | 1.2E-06 |
| 702.508021 | C38 H73 O8 N1<br>P1 | 0.13ppm  | <b>PE [33:1]</b> | 3.62E-05 | 3.4E-06 | 1.66E-05 | 1.0E-06 |
| 710.477663 | C39 H69 O8 N1<br>P1 | 1.45ppm  | <b>PE [34:4]</b> | 1.90E-05 | 9.7E-07 | 4.84E-06 | 6.5E-07 |
| 712.492596 | C39 H71 O8 N1<br>P1 | 0.44ppm  | <b>PE [34:3]</b> | 7.88E-04 | 3.2E-05 | 1.60E-04 | 2.7E-05 |
| 714.507797 | C39 H73 O8 N1<br>P1 | -0.19ppm | <b>PE [34:2]</b> | 4.07E-03 | 1.1E-04 | 9.45E-04 | 1.9E-04 |
| 716.522466 | C39 H75 O8 N1<br>P1 | -1.55ppm | <b>PE [34:1]</b> | 3.95E-03 | 1.0E-04 | 7.65E-04 | 1.7E-04 |
| 726.507393 | C40 H73 O8 N1<br>P1 | -0.74ppm | <b>PE [35:3]</b> | 5.39E-06 | 3.5E-07 | 4.54E-06 | 7.9E-08 |
| 728.523116 | C40 H75 O8 N1<br>P1 | -0.64ppm | <b>PE [35:2]</b> | 2.37E-05 | 1.0E-06 | 1.15E-05 | 1.1E-06 |
| 730.538757 | C40 H77 O8 N1<br>P1 | -0.65ppm | <b>PE [35:1]</b> | 1.96E-05 | 1.4E-06 | 9.07E-06 | 7.6E-07 |
| 736.492086 | C41 H71 O8 N1<br>P1 | -0.26ppm | <b>PE [36:5]</b> | 2.02E-05 | 1.1E-06 | 5.02E-06 | 1.1E-06 |

|                            |                      |          |                  |          |         |          |         |
|----------------------------|----------------------|----------|------------------|----------|---------|----------|---------|
| 738.507943                 | C41 H73 O8 N1<br>P1  | 0.02ppm  | <b>PE [36:4]</b> | 5.72E-04 | 4.2E-05 | 1.22E-04 | 2.2E-05 |
| 740.523417                 | C41 H75 O8 N1<br>P1  | -0.22ppm | <b>PE [36:3]</b> | 1.17E-03 | 5.9E-05 | 2.51E-04 | 4.7E-05 |
| 742.53886                  | C41 H77 O8 N1<br>P1  | -0.50ppm | <b>PE [36:2]</b> | 1.10E-03 | 4.1E-05 | 2.47E-04 | 5.3E-05 |
| 744.554278                 | C41 H79 O8 N1<br>P1  | -0.81ppm | <b>PE [36:1]</b> | 1.47E-04 | 6.9E-06 | 4.21E-05 | 3.6E-06 |
| 756.555094                 | C42 H79 O8 N1<br>P1  | 0.28ppm  | <b>PE [37:2]</b> | 2.64E-06 | 4.3E-07 | 1.60E-06 | 7.3E-08 |
| 768.555124                 | C43 H79 O8 N1<br>P1  | 0.32ppm  | <b>PE [38:3]</b> | 4.30E-06 | 7.0E-07 | 1.31E-06 | 2.5E-07 |
| 770.570878                 | C43 H81 O8 N1<br>P1  | 0.45ppm  | <b>PE [38:2]</b> | 1.56E-05 | 1.4E-06 | 3.75E-06 | 8.7E-07 |
| 772.586519                 | C43 H83 O8 N1<br>P1  | 0.44ppm  | <b>PE [38:1]</b> | 6.37E-06 | 5.8E-07 | 4.47E-06 | 6.0E-07 |
|                            |                      |          | <b>Total-PE</b>  | 1.48E-02 | 4.9E-04 | 3.07E-03 | 6.0E-04 |
| <b>Phosphatidylcholine</b> |                      |          |                  |          |         |          |         |
| 790.5606                   | C42 H81 O10 N1<br>P1 | 0.31ppm  | <b>PC [32:1]</b> | 7.10E-04 | 3.7E-05 | 1.53E-04 | 3.1E-05 |
| 800.5451                   | C43 H79 O10 N1<br>P1 | 0.51ppm  | <b>PC [33:3]</b> | 4.25E-05 | 2.1E-06 | 1.30E-05 | 2.0E-07 |
| 802.5608                   | C43 H81 O10 N1<br>P1 | 0.58ppm  | <b>PC [33:2]</b> | 8.94E-05 | 1.9E-06 | 1.76E-05 | 2.1E-06 |
| 804.5764                   | C43 H83 O10 N1<br>P1 | 0.47ppm  | <b>PC [33:1]</b> | 4.11E-05 | 2.8E-06 | 1.09E-05 | 5.6E-07 |
| 812.5452                   | C44 H79 O10 N1<br>P1 | 0.55ppm  | <b>PC [34:4]</b> | 1.06E-04 | 7.9E-06 | 2.66E-05 | 1.6E-06 |
| 814.561                    | C44 H81 O10 N1<br>P1 | 0.79ppm  | <b>PC [34:3]</b> | 1.49E-03 | 9.2E-05 | 3.81E-04 | 4.8E-05 |

|                             |                      |              |                  |              |             |              |             |
|-----------------------------|----------------------|--------------|------------------|--------------|-------------|--------------|-------------|
| 816.5765                    | C44 H83 O10 N1<br>P1 | 0.60pp<br>m  | <b>PC [34:2]</b> | 2.95E-<br>03 | 1.3E-<br>04 | 7.66E-04     | 1.4E-<br>04 |
| 818.5914                    | C44 H85 O10 N1<br>P1 | -0.34pp<br>m | <b>PC [34:1]</b> | 5.45E-<br>04 | 6.1E-<br>06 | 1.21E-04     | 2.6E-<br>05 |
| 830.5922                    | C45 H85 O10 N1<br>P1 | 0.69pp<br>m  | <b>PC [35:2]</b> | 3.81E-<br>05 | 2.2E-<br>06 | 9.43E-06     | 1.1E-<br>06 |
| 840.5765                    | C46 H83 O10 N1<br>P1 | 0.61pp<br>m  | <b>PC [36:4]</b> | 1.15E-<br>03 | 1.1E-<br>04 | 3.15E-04     | 3.6E-<br>05 |
| 842.592                     | C46 H85 O10 N1<br>P1 | 0.46pp<br>m  | <b>PC [36:3]</b> | 9.45E-<br>04 | 4.9E-<br>05 | 2.09E-04     | 3.3E-<br>05 |
| 844.6075                    | C46 H87 O10 N1<br>P1 | 0.20pp<br>m  | <b>PC [36:2]</b> | 1.75E-<br>04 | 5.7E-<br>06 | 3.70E-05     | 9.2E-<br>06 |
|                             |                      |              | <b>Total-PC</b>  | 8.36E-<br>03 | 4.3E-<br>04 | 1.91E-03     | 3.3E-<br>04 |
| <b>Phosphatidylinositol</b> |                      |              |                  |              |             |              |             |
| 777.4563                    | C39 H70 O13 P1       | 0.43pp<br>m  | <b>PI [30:2]</b> | 3.08E-<br>05 | 2.5E-<br>06 | 6.93E-<br>06 | 7.0E-<br>07 |
| 779.4719                    | C39 H72 O13 P1       | 0.43pp<br>m  | <b>PI [30:1]</b> | 3.77E-<br>05 | 1.6E-<br>06 | 1.48E-<br>05 | 1.7E-<br>06 |
| 803.472                     | C41 H72 O13 P1       | 0.53pp<br>m  | <b>PI [32:3]</b> | 3.81E-<br>05 | 8.0E-<br>07 | 9.25E-<br>06 | 9.0E-<br>07 |
| 805.4877                    | C41 H74 O13 P1       | 0.55pp<br>m  | <b>PI [32:2]</b> | 5.20E-<br>04 | 2.6E-<br>05 | 1.10E-<br>04 | 1.0E-<br>05 |
| 807.5033                    | C41 H76 O13 P1       | 0.45pp<br>m  | <b>PI [32:1]</b> | 2.15E-<br>04 | 2.3E-<br>05 | 9.28E-<br>05 | 7.1E-<br>06 |
| 819.5034                    | C42 H76 O13 P1       | 0.62pp<br>m  | <b>PI [33:2]</b> | 3.10E-<br>05 | 3.2E-<br>06 | 6.76E-<br>06 | 6.9E-<br>07 |
| 821.519                     | C42 H78 O13 P1       | 0.55pp<br>m  | <b>PI [33:1]</b> | 8.65E-<br>06 | 1.6E-<br>06 | 4.84E-<br>06 | 1.5E-<br>07 |
| 829.4878                    | C43 H74 O13 P1       | 0.69pp<br>m  | <b>PI [34:4]</b> | 4.75E-<br>05 | 1.4E-<br>06 | 1.12E-<br>05 | 1.2E-<br>06 |

|                           |                      |              |                  |          |         |          |         |
|---------------------------|----------------------|--------------|------------------|----------|---------|----------|---------|
| 831.5034                  | C43 H76 O13 P1       | 0.62pp<br>m  | <b>PI [34:3]</b> | 8.45E-04 | 4.5E-06 | 1.68E-04 | 2.7E-05 |
| 833.5188                  | C43 H78 O13 P1       | 0.25pp<br>m  | <b>PI [34:2]</b> | 3.02E-03 | 3.4E-05 | 5.75E-04 | 1.4E-04 |
| 845.519                   | C44 H78 O13 P1       | 0.55pp<br>m  | <b>PI [35:3]</b> | 1.58E-05 | 4.1E-07 | 5.56E-06 | 3.7E-07 |
| 847.5347                  | C44 H80 O13 P1       | 0.54pp<br>m  | <b>PI [35:2]</b> | 3.58E-05 | 2.9E-06 | 1.05E-05 | 1.1E-06 |
| 855.5035                  | C45 H76 O13 P1       | 0.65pp<br>m  | <b>PI [36:5]</b> | 6.09E-05 | 2.5E-06 | 1.54E-05 | 1.7E-06 |
| 857.519                   | C45 H78 O13 P1       | 0.50pp<br>m  | <b>PI [36:4]</b> | 7.81E-04 | 2.5E-05 | 1.82E-04 | 2.4E-05 |
| 859.5344                  | C45 H80 O13 P1       | 0.27pp<br>m  | <b>PI [36:3]</b> | 1.41E-03 | 3.2E-06 | 2.48E-04 | 4.9E-05 |
| 861.5499                  | C45 H82 O13 P1       | -0.00pp<br>m | <b>PI [36:2]</b> | 3.81E-04 | 1.0E-05 | 7.83E-05 | 1.2E-05 |
| 889.5817                  | C47 H86 O13 P1       | 0.57pp<br>m  | <b>PI [38:2]</b> | 4.41E-06 | 8.8E-07 | 1.25E-06 | 1.0E-07 |
|                           |                      |              | <b>Total-PI</b>  | 7.49E-03 | 6.8E-05 | 1.38E-03 | 2.5E-04 |
| <b>Phosphatidylserine</b> |                      |              |                  |          |         |          |         |
| 730.4661                  | C38 H69 O10 N1<br>P1 | -0.52pp<br>m | <b>PS [32:2]</b> | 4.13E-05 | 3.5E-06 | 9.83E-06 | 4.8E-07 |
| 732.4818                  | C38 H71 O10 N1<br>P1 | -0.43pp<br>m | <b>PS [32:1]</b> | 1.07E-04 | 9.9E-06 | 2.49E-05 | 2.5E-06 |
| 734.4976                  | C38 H73 O10 N1<br>P1 | -0.28pp<br>m | <b>PS [32:0]</b> | 2.12E-05 | 1.3E-06 | 8.38E-06 | 2.4E-07 |
| 758.4979                  | C40 H73 O10 N1<br>P1 | 0.14pp<br>m  | <b>PS [34:2]</b> | 8.41E-04 | 7.5E-05 | 1.92E-04 | 1.3E-05 |

|                                          |                      |              |                   |              |             |              |             |
|------------------------------------------|----------------------|--------------|-------------------|--------------|-------------|--------------|-------------|
| 760.5134                                 | C40 H75 O10 N1<br>P1 | 0.01pp<br>m  | <b>PS [34:1]</b>  | 7.42E-<br>04 | 7.5E-<br>05 | 1.70E-<br>04 | 1.2E-<br>05 |
| 774.5302                                 | C41 H77 O10 N1<br>P1 | 1.44pp<br>m  | <b>PS [35:1]</b>  | 3.05E-<br>05 | 2.1E-<br>06 | 1.63E-<br>05 | 9.6E-<br>07 |
| 782.4982                                 | C42 H73 O10 N1<br>P1 | 0.53pp<br>m  | <b>PS [36:4]</b>  | 5.43E-<br>04 | 5.4E-<br>05 | 1.18E-<br>04 | 7.1E-<br>06 |
| 786.5292                                 | C42 H77 O10 N1<br>P1 | 0.14pp<br>m  | <b>PS [36:2]</b>  | 3.48E-<br>03 | 3.1E-<br>04 | 8.72E-<br>04 | 6.4E-<br>05 |
| 788.5448                                 | C42 H79 O10 N1<br>P1 | 0.17pp<br>m  | <b>PS [36:1]</b>  | 1.84E-<br>03 | 1.8E-<br>04 | 5.37E-<br>04 | 3.0E-<br>05 |
|                                          |                      |              | <b>Total-PS</b>   | 7.68E-<br>03 | 6.5E-<br>04 | 1.92E-<br>03 | 1.3E-<br>04 |
| <b>Ceramides</b>                         |                      |              |                   |              |             |              |             |
| 568.4941                                 | C34 H66 O5 N1        | -0.89pp<br>m | <b>Cer [32:1]</b> | 7.23E-<br>06 | 2.6E-<br>07 | 1.56E-<br>06 | 2.1E-<br>07 |
| 594.5102                                 | C36 H68 O5 N1        | -0.21pp<br>m | <b>Cer [34:2]</b> | 7.20E-<br>06 | 1.6E-<br>07 | 3.33E-<br>06 | 1.9E-<br>07 |
| 596.526                                  | C36 H70 O5 N1        | 0.02ppm      | <b>Cer [34:1]</b> | 8.35E-<br>05 | 2.3E-<br>06 | 2.18E-<br>05 | 1.3E-<br>06 |
| 622.5415                                 | C38 H72 O5 N1        | -0.10pp<br>m | <b>Cer [36:2]</b> | 9.26E-<br>06 | 9.3E-<br>07 | 3.51E-<br>06 | 5.3E-<br>07 |
| 624.5572                                 | C38 H74 O5 N1        | -0.03pp<br>m | <b>Cer [36:1]</b> | 7.63E-<br>05 | 7.6E-<br>06 | 1.77E-<br>05 | 2.1E-<br>06 |
| 650.5727                                 | C40 H76 O5 N1        | -0.23pp<br>m | <b>Cer [38:2]</b> | 2.70E-<br>06 | 1.8E-<br>07 | 9.22E-<br>07 | 1.7E-<br>07 |
| 652.5883                                 | C40 H78 O5 N1        | -0.37pp<br>m | <b>Cer [38:1]</b> | 6.39E-<br>06 | 9.1E-<br>07 | 1.58E-<br>06 | 9.8E-<br>08 |
|                                          |                      |              | <b>Total-Cer</b>  | 1.96E-<br>04 | 7.4E-<br>06 | 4.88E-<br>05 | 4.4E-<br>06 |
| <b>Phosphatidylethanolamine-Ceramide</b> |                      |              |                   |              |             |              |             |





| Quantification based on the pMol lipid/ $\mu$ g of Protein |                     |                |             |                      |             |                                            |             |
|------------------------------------------------------------|---------------------|----------------|-------------|----------------------|-------------|--------------------------------------------|-------------|
| <i>m/z</i><br>measured                                     | Chemical<br>formula | Error<br>(ppm) | Assignment  | CS on Normal<br>food |             | <i>itpr<sup>ku</sup></i> on Normal<br>food |             |
|                                                            |                     |                |             | Averag<br>e          | SEM         | Averag<br>e                                | SEM         |
| <b>Phosphatidylethyleneamine</b>                           |                     |                |             |                      |             |                                            |             |
| 698.5129                                                   | C39 H73 O7 N1<br>P1 | -0.12pp<br>m   | PE-O [34:3] | 2.42E-<br>01         | 5.9E-<br>02 | 8.30E-<br>02                               | 3.0E-<br>02 |
| 716.5607                                                   | C40 H79 O7 N1<br>P1 | 0.98ppm        | PE-O [35:1] | 5.89E-<br>02         | 1.1E-<br>02 | 1.65E-<br>02                               | 2.9E-<br>03 |
| 726.5437                                                   | C41 H77 O7 N1<br>P1 | -0.82pp<br>m   | PE-O [36:3] | 7.92E-<br>01         | 4.6E-<br>02 | 1.60E-<br>01                               | 1.1E-<br>01 |
| 728.5594                                                   | C41 H79 O7 N1<br>P1 | -0.78pp<br>m   | PE-O [36:2] | 6.76E-<br>01         | 3.9E-<br>02 | 1.51E-<br>01                               | 1.2E-<br>01 |
| 730.575                                                    | C41 H81 O7 N1<br>P1 | -0.86pp<br>m   | PE-O [36:1] | 1.70E-<br>01         | 6.3E-<br>03 | 2.82E-<br>02                               | 2.4E-<br>02 |
|                                                            |                     |                | Total-PE-O  | 2.22E+<br>00         | 7.4E-<br>02 | 6.36E-<br>01                               | 4.1E-<br>01 |
| <b>Phosphatidylethanolamine</b>                            |                     |                |             |                      |             |                                            |             |
| 632.42943                                                  | C33 H63 O8 N1<br>P1 | -0.39pp<br>m   | PE [28:1]   | 2.03E-<br>01         | 2.4E-<br>02 | 3.86E-<br>02                               | 8.4E-<br>03 |
| 634.44511                                                  | C33 H65 O8 N1<br>P1 | -0.34pp<br>m   | PE [28:0]   | 2.49E-<br>01         | 1.1E-<br>02 | 5.55E-<br>02                               | 3.6E-<br>02 |
| 658.44499                                                  | C35 H65 O8 N1<br>P1 | -0.51pp<br>m   | PE [30:2]   | 1.46E-<br>01         | 8.7E-<br>03 | 2.92E-<br>02                               | 7.3E-<br>03 |
| 660.46096                                                  | C35 H67 O8 N1<br>P1 | -0.03pp<br>m   | PE [30:1]   | 4.34E+<br>00         | 2.7E-<br>01 | 8.08E-<br>01                               | 1.7E-<br>01 |
| 662.4763                                                   | C35 H69 O8 N1<br>P1 | -0.49pp<br>m   | PE [30:0]   | 6.79E-<br>01         | 1.6E-<br>02 | 1.50E-<br>01                               | 9.9E-<br>02 |
| 676.49202                                                  | C36 H71 O8 N1       | -0.38pp        | PE [31:0]   | 1.19E-<br>01         | 2.4E-<br>02 | 2.80E-<br>02                               | 4.7E-<br>02 |

|           | P1                  | m            |           | 01           | 02          | 02           | 03          |
|-----------|---------------------|--------------|-----------|--------------|-------------|--------------|-------------|
| 684.46111 | C37 H67 O8 N1<br>P1 | 0.19ppm      | PE [32:3] | 5.41E-<br>01 | 3.4E-<br>02 | 1.42E-<br>01 | 3.6E-<br>02 |
| 686.47681 | C37 H69 O8 N1<br>P1 | 0.26ppm      | PE [32:2] | 1.35E+<br>01 | 9.1E-<br>01 | 2.69E+<br>00 | 6.0E-<br>01 |
| 688.49225 | C37 H71 O8 N1<br>P1 | -0.04pp<br>m | PE [32:1] | 2.57E+<br>01 | 1.5E+0<br>0 | 4.67E+<br>00 | 1.1E+<br>00 |
| 690.50689 | C37 H73 O8 N1<br>P1 | -1.51pp<br>m | PE [32:0] | 8.89E-<br>02 | 2.4E-<br>02 | 3.45E-<br>02 | 5.1E-<br>02 |
| 698.47496 | C38 H69 O8 N1<br>P1 | -2.39pp<br>m | PE [33:3] | 4.89E-<br>02 | 3.5E-<br>03 | 1.58E-<br>02 | 1.5E-<br>03 |
| 700.49226 | C38 H71 O8 N1<br>P1 | -0.03pp<br>m | PE [33:2] | 5.75E-<br>01 | 2.6E-<br>02 | 1.58E-<br>01 | 3.6E-<br>02 |
| 702.50802 | C38 H73 O8 N1<br>P1 | 0.13ppm      | PE [33:1] | 5.85E-<br>01 | 6.3E-<br>02 | 2.80E-<br>01 | 2.4E-<br>02 |
| 710.47766 | C39 H69 O8 N1<br>P1 | 1.45ppm      | PE [34:4] | 3.06E-<br>01 | 1.6E-<br>02 | 7.65E-<br>02 | 1.7E-<br>02 |
| 712.4926  | C39 H71 O8 N1<br>P1 | 0.44ppm      | PE [34:3] | 1.27E+<br>01 | 7.0E-<br>01 | 2.34E+<br>00 | 5.9E-<br>01 |
| 714.5078  | C39 H73 O8 N1<br>P1 | -0.19pp<br>m | PE [34:2] | 6.57E+<br>01 | 2.9E+0<br>0 | 1.46E+<br>01 | 5.1E+<br>00 |
| 716.52247 | C39 H75 O8 N1<br>P1 | -1.55pp<br>m | PE [34:1] | 6.38E+<br>01 | 2.5E+0<br>0 | 1.06E+<br>01 | 3.7E+<br>00 |
| 726.50739 | C40 H73 O8 N1<br>P1 | -0.74pp<br>m | PE [35:3] | 8.69E-<br>02 | 6.1E-<br>03 | 7.70E-<br>02 | 1.2E-<br>04 |
| 728.52312 | C40 H75 O8 N1<br>P1 | -0.64pp<br>m | PE [35:2] | 3.82E-<br>01 | 2.2E-<br>02 | 1.92E-<br>01 | 2.6E-<br>02 |
| 730.53876 | C40 H77 O8 N1<br>P1 | -0.65pp<br>m | PE [35:1] | 3.16E-<br>01 | 2.9E-<br>02 | 1.48E-<br>01 | 1.4E-<br>02 |
| 736.49209 | C41 H71 O8 N1<br>P1 | -0.26pp<br>m | PE [36:5] | 3.25E-<br>01 | 1.7E-<br>02 | 7.84E-<br>02 | 2.9E-<br>02 |

|                            |                      |              |           |              |             |              |             |
|----------------------------|----------------------|--------------|-----------|--------------|-------------|--------------|-------------|
| 738.50794                  | C41 H73 O8 N1<br>P1  | 0.02ppm      | PE [36:4] | 9.23E+<br>00 | 7.1E-<br>01 | 1.86E+<br>00 | 4.8E-<br>01 |
| 740.52342                  | C41 H75 O8 N1<br>P1  | -0.22pp<br>m | PE [36:3] | 1.88E+<br>01 | 1.2E+0<br>0 | 3.74E+<br>00 | 1.0E+<br>00 |
| 742.53886                  | C41 H77 O8 N1<br>P1  | -0.50pp<br>m | PE [36:2] | 1.78E+<br>01 | 9.7E-<br>01 | 3.48E+<br>00 | 1.2E+<br>00 |
| 744.55428                  | C41 H79 O8 N1<br>P1  | -0.81pp<br>m | PE [36:1] | 2.37E+<br>00 | 3.2E-<br>02 | 5.94E-<br>01 | 1.8E-<br>01 |
| 756.55509                  | C42 H79 O8 N1<br>P1  | 0.28ppm      | PE [37:2] | 4.25E-<br>02 | 7.3E-<br>03 | 1.93E-<br>02 | 1.4E-<br>03 |
| 768.55512                  | C43 H79 O8 N1<br>P1  | 0.32ppm      | PE [38:3] | 6.89E-<br>02 | 9.4E-<br>03 | 2.04E-<br>02 | 1.0E-<br>02 |
| 770.57088                  | C43 H81 O8 N1<br>P1  | 0.45ppm      | PE [38:2] | 2.51E-<br>01 | 1.9E-<br>02 | 5.35E-<br>02 | 2.0E-<br>02 |
| 772.58652                  | C43 H83 O8 N1<br>P1  | 0.44ppm      | PE [38:1] | 1.02E-<br>01 | 7.6E-<br>03 | 7.05E-<br>02 | 2.4E-<br>02 |
|                            |                      |              | Total-PE  | 2.39E+<br>02 | 1.2E+0<br>1 | 4.47E+<br>01 | 1.4E+<br>01 |
| <b>Phosphatidylcholine</b> |                      |              |           |              |             |              |             |
| 790.5606                   | C42 H81 O10 N1<br>P1 | 0.31ppm      | PC [32:1] | 1.15E+<br>01 | 8.4E-<br>01 | 2.34E+<br>00 | 5.8E-<br>01 |
| 800.5451                   | C43 H79 O10 N1<br>P1 | 0.51ppm      | PC [33:3] | 6.91E-<br>01 | 6.9E-<br>02 | 2.37E-<br>01 | 1.6E-<br>02 |
| 802.5608                   | C43 H81 O10 N1<br>P1 | 0.58ppm      | PC [33:2] | 1.44E+<br>00 | 5.5E-<br>02 | 3.08E-<br>01 | 3.1E-<br>02 |
| 804.5764                   | C43 H83 O10 N1<br>P1 | 0.47ppm      | PC [33:1] | 6.62E-<br>01 | 4.9E-<br>02 | 1.87E-<br>01 | 2.3E-<br>02 |
| 812.5452                   | C44 H79 O10 N1<br>P1 | 0.55ppm      | PC [34:4] | 1.71E+<br>00 | 1.7E-<br>01 | 4.32E-<br>01 | 3.3E-<br>02 |
| 814.561                    | C44 H81 O10 N1<br>P1 | 0.79ppm      | PC [34:3] | 2.41E+<br>01 | 1.9E+0<br>0 | 6.00E+<br>00 | 1.2E+<br>00 |

|          |                      |              |           |              |             |              |             |
|----------|----------------------|--------------|-----------|--------------|-------------|--------------|-------------|
| 816.5765 | C44 H83 O10 N1<br>P1 | 0.60ppm      | PC [34:2] | 4.76E+<br>01 | 2.9E+0<br>0 | 1.19E+<br>01 | 3.7E+<br>00 |
| 818.5914 | C44 H85 O10 N1<br>P1 | -0.34pp<br>m | PC [34:1] | 8.81E+<br>00 | 4.6E-<br>01 | 2.09E+<br>00 | 5.9E-<br>01 |
| 830.5922 | C45 H85 O10 N1<br>P1 | 0.69ppm      | PC [35:2] | 6.17E-<br>01 | 5.4E-<br>02 | 1.56E-<br>01 | 3.0E-<br>02 |
| 840.5765 | C46 H83 O10 N1<br>P1 | 0.61ppm      | PC [36:4] | 1.86E+<br>01 | 1.8E+0<br>0 | 4.96E+<br>00 | 9.0E-<br>01 |
| 842.592  | C46 H85 O10 N1<br>P1 | 0.46ppm      | PC [36:3] | 1.53E+<br>01 | 9.8E-<br>01 | 3.20E+<br>00 | 7.2E-<br>01 |
| 844.6075 | C46 H87 O10 N1<br>P1 | 0.20ppm      | PC [36:2] | 2.83E+<br>00 | 1.2E-<br>01 | 5.47E-<br>01 | 2.3E-<br>01 |
|          |                      |              | Total-PC  | 1.35E+<br>02 | 9.0E+0<br>0 | 2.95E+<br>01 | 7.9E+<br>00 |

**Phosphatidylinositol**

|          |                |         |           |              |             |              |             |
|----------|----------------|---------|-----------|--------------|-------------|--------------|-------------|
| 777.4563 | C39 H70 O13 P1 | 0.43ppm | PI [30:2] | 4.97E-<br>01 | 4.1E-<br>02 | 1.08E-<br>01 | 2.9E-<br>02 |
| 779.4719 | C39 H72 O13 P1 | 0.43ppm | PI [30:1] | 6.07E-<br>01 | 2.1E-<br>02 | 2.23E-<br>01 | 8.0E-<br>02 |
| 803.472  | C41 H72 O13 P1 | 0.53ppm | PI [32:3] | 6.17E-<br>01 | 4.3E-<br>02 | 1.51E-<br>01 | 3.0E-<br>02 |
| 805.4877 | C41 H74 O13 P1 | 0.55ppm | PI [32:2] | 8.39E+<br>00 | 4.7E-<br>01 | 1.60E+<br>00 | 2.9E-<br>01 |
| 807.5033 | C41 H76 O13 P1 | 0.45ppm | PI [32:1] | 3.47E+<br>00 | 4.2E-<br>01 | 1.48E+<br>00 | 8.2E-<br>02 |
| 819.5034 | C42 H76 O13 P1 | 0.62ppm | PI [33:2] | 5.02E-<br>01 | 6.1E-<br>02 | 1.09E-<br>01 | 2.5E-<br>02 |
| 821.519  | C42 H78 O13 P1 | 0.55ppm | PI [33:1] | 1.40E-<br>01 | 2.8E-<br>02 | 8.15E-<br>02 | 9.2E-<br>03 |
| 829.4878 | C43 H74 O13 P1 | 0.69ppm | PI [34:4] | 7.66E-<br>01 | 2.4E-<br>02 | 1.77E-<br>01 | 3.4E-<br>02 |

|                           |                      |              |           |              |             |              |             |
|---------------------------|----------------------|--------------|-----------|--------------|-------------|--------------|-------------|
| 831.5034                  | C43 H76 O13 P1       | 0.62ppm      | PI [34:3] | 1.37E+<br>01 | 6.7E-<br>01 | 2.66E+<br>00 | 7.5E-<br>01 |
| 833.5188                  | C43 H78 O13 P1       | 0.25ppm      | PI [34:2] | 4.88E+<br>01 | 2.1E+0<br>0 | 8.80E+<br>00 | 4.0E+<br>00 |
| 845.519                   | C44 H78 O13 P1       | 0.55ppm      | PI [35:3] | 2.55E-<br>01 | 8.5E-<br>03 | 9.45E-<br>02 | 1.4E-<br>02 |
| 847.5347                  | C44 H80 O13 P1       | 0.54ppm      | PI [35:2] | 5.79E-<br>01 | 5.8E-<br>02 | 1.74E-<br>01 | 3.4E-<br>02 |
| 855.5035                  | C45 H76 O13 P1       | 0.65ppm      | PI [36:5] | 9.82E-<br>01 | 4.6E-<br>02 | 2.45E-<br>01 | 4.8E-<br>02 |
| 857.519                   | C45 H78 O13 P1       | 0.50ppm      | PI [36:4] | 1.26E+<br>01 | 5.0E-<br>01 | 2.89E+<br>00 | 6.4E-<br>01 |
| 859.5344                  | C45 H80 O13 P1       | 0.27ppm      | PI [36:3] | 2.28E+<br>01 | 1.2E+0<br>0 | 3.52E+<br>00 | 1.2E+<br>00 |
| 861.5499                  | C45 H82 O13 P1       | -0.00pp<br>m | PI [36:2] | 6.16E+<br>00 | 4.1E-<br>01 | 1.37E+<br>00 | 2.0E-<br>01 |
| 889.5817                  | C47 H86 O13 P1       | 0.57ppm      | PI [38:2] | 7.17E-<br>02 | 1.6E-<br>02 | 2.30E-<br>02 | 1.6E-<br>03 |
|                           |                      |              | Total-PI  | 1.21E+<br>02 | 5.5E+0<br>0 | 2.16E+<br>01 | 6.2E+<br>00 |
| <b>Phosphatidylserine</b> |                      |              |           |              |             |              |             |
| 730.4661                  | C38 H69 O10 N1<br>P1 | -0.52pp<br>m | PS [32:2] | 6.67E-<br>01 | 6.1E-<br>02 | 1.58E-<br>01 | 2.8E-<br>02 |
| 732.4818                  | C38 H71 O10 N1<br>P1 | -0.43pp<br>m | PS [32:1] | 1.73E+<br>00 | 1.6E-<br>01 | 3.80E-<br>01 | 9.3E-<br>02 |
| 734.4976                  | C38 H73 O10 N1<br>P1 | -0.28pp<br>m | PS [32:0] | 3.41E-<br>01 | 2.0E-<br>03 | 1.27E-<br>01 | 1.6E-<br>02 |
| 758.4979                  | C40 H73 O10 N1<br>P1 | 0.14ppm      | PS [34:2] | 1.36E+<br>01 | 1.2E+0<br>0 | 3.00E+<br>00 | 5.0E-<br>01 |
| 760.5134                  | C40 H75 O10 N1<br>P1 | 0.01ppm      | PS [34:1] | 1.19E+<br>01 | 1.2E+0<br>0 | 2.70E+<br>00 | 4.2E-<br>01 |



|                                          |                      |          |                 |              |             |              |             |
|------------------------------------------|----------------------|----------|-----------------|--------------|-------------|--------------|-------------|
| 774.5302                                 | C41 H77 O10 N1<br>P1 | 1.44ppm  | PS [35:1]       | 4.96E-<br>01 | 5.9E-<br>02 | 2.63E-<br>01 | 3.2E-<br>02 |
| 782.4982                                 | C42 H73 O10 N1<br>P1 | 0.53ppm  | PS [36:4]       | 8.73E+<br>00 | 8.0E-<br>01 | 1.90E+<br>00 | 2.6E-<br>01 |
| 786.5292                                 | C42 H77 O10 N1<br>P1 | 0.14ppm  | PS [36:2]       | 5.61E+<br>01 | 4.8E+0<br>0 | 1.32E+<br>01 | 2.3E+<br>00 |
| 788.5448                                 | C42 H79 O10 N1<br>P1 | 0.17ppm  | PS [36:1]       | 2.95E+<br>01 | 1.4E+0<br>0 | 8.00E+<br>00 | 6.0E-<br>01 |
|                                          |                      |          | Total-PS        | 1.23E+<br>02 | 8.7E+0<br>0 | 2.92E+<br>01 | 4.2E+<br>00 |
| <b>Ceramides</b>                         |                      |          |                 |              |             |              |             |
| 568.4941                                 | C34 H66 O5 N1<br>m   | -0.89ppm | Cer [32:1]      | 1.16E-<br>01 | 2.9E-<br>03 | 2.40E-<br>02 | 6.4E-<br>03 |
| 594.5102                                 | C36 H68 O5 N1<br>m   | -0.21ppm | Cer [34:2]      | 1.17E-<br>01 | 8.0E-<br>03 | 5.33E-<br>02 | 2.7E-<br>03 |
| 596.526                                  | C36 H70 O5 N1<br>m   | 0.02ppm  | Cer [34:1]      | 1.35E+<br>00 | 9.0E-<br>02 | 3.57E-<br>01 | 1.9E-<br>02 |
| 622.5415                                 | C38 H72 O5 N1<br>m   | -0.10ppm | Cer [36:2]      | 1.50E-<br>01 | 1.7E-<br>02 | 5.43E-<br>02 | 1.1E-<br>02 |
| 624.5572                                 | C38 H74 O5 N1<br>m   | -0.03ppm | Cer [36:1]      | 1.23E+<br>00 | 1.4E-<br>01 | 2.80E-<br>01 | 4.9E-<br>02 |
| 650.5727                                 | C40 H76 O5 N1<br>m   | -0.23ppm | Cer [38:2]      | 4.33E-<br>02 | 1.3E-<br>03 | 1.46E-<br>02 | 6.9E-<br>03 |
| 652.5883                                 | C40 H78 O5 N1<br>m   | -0.37ppm | Cer [38:1]      | 1.03E-<br>01 | 1.5E-<br>02 | 2.43E-<br>02 | 2.6E-<br>04 |
|                                          |                      |          | Total-Cer       | 3.18E+<br>00 | 2.0E-<br>01 | 7.78E-<br>01 | 8.0E-<br>02 |
| <b>Phosphatidylethanolamine-Ceramide</b> |                      |          |                 |              |             |              |             |
| 629.4661                                 | C34 H66 O6 N2<br>P1  | -0.46ppm | CerPE<br>[32:2] | 3.96E-<br>01 | 2.1E-<br>02 | 9.79E-<br>02 | 1.5E-<br>02 |

|          |                     |              |                 |              |             |              |             |
|----------|---------------------|--------------|-----------------|--------------|-------------|--------------|-------------|
| 631.4818 | C34 H68 O6 N2<br>P1 | -0.36pp<br>m | CerPE<br>[32:1] | 3.13E+<br>00 | 5.3E-<br>02 | 6.47E-<br>01 | 2.5E-<br>01 |
| 645.4976 | C35 H70 O6 N2<br>P1 | -0.17pp<br>m | CerPE<br>[33:1] | 4.02E-<br>02 | 1.6E-<br>03 | 2.12E-<br>02 | 6.3E-<br>03 |
| 657.4975 | C36 H70 O6 N2<br>P1 | -0.36pp<br>m | CerPE<br>[34:2] | 1.45E+<br>00 | 8.9E-<br>02 | 4.70E-<br>01 | 1.5E-<br>02 |
| 659.5132 | C36 H72 O6 N2<br>P1 | -0.23pp<br>m | CerPE<br>[34:1] | 1.38E+<br>01 | 5.8E-<br>01 | 2.53E+<br>00 | 1.7E+<br>00 |
| 661.5279 | C36 H74 O6 N2<br>P1 | -1.72pp<br>m | CerPE<br>[34:0] | 4.24E-<br>02 | 2.5E-<br>03 | 2.11E-<br>02 | 6.4E-<br>03 |
| 673.5288 | C37 H74 O6 N2<br>P1 | -0.25pp<br>m | CerPE<br>[35:1] | 1.21E-<br>01 | 8.7E-<br>03 | 1.58E-<br>01 | 6.8E-<br>03 |
| 685.529  | C38 H74 O6 N2<br>P1 | -0.03pp<br>m | CerPE<br>[36:2] | 1.17E+<br>00 | 6.8E-<br>02 | 3.85E-<br>01 | 2.8E-<br>02 |
| 687.5446 | C38 H76 O6 N2<br>P1 | -0.02pp<br>m | CerPE<br>[36:1] | 9.39E+<br>00 | 6.5E-<br>01 | 1.76E+<br>00 | 8.4E-<br>01 |
| 701.5601 | C39 H78 O6 N2<br>P1 | -0.31pp<br>m | CerPE<br>[37:1] | 1.03E-<br>01 | 4.7E-<br>03 | 1.28E-<br>01 | 7.9E-<br>03 |
| 713.5601 | C40 H78 O6 N2<br>P1 | -0.24pp<br>m | CerPE<br>[38:2] | 2.50E-<br>01 | 1.2E-<br>02 | 4.70E-<br>02 | 1.9E-<br>02 |
| 715.5748 | C40 H80 O6 N2<br>P1 | -1.61pp<br>m | CerPE<br>[38:1] | 4.85E-<br>01 | 2.6E-<br>02 | 9.55E-<br>02 | 6.8E-<br>02 |
|          |                     |              | Total-CerPE     | 3.05E+<br>01 | 1.3E+0<br>0 | 6.04E+<br>00 | 2.7E+<br>00 |

**Supplementary Table 2. Internal standard mixture for Shotgun lipidomics experiments**

| <b>SLNo</b> | <b>Lipid Standard</b>      | <b>Concentration (<math>\mu\text{M}</math>)</b> |
|-------------|----------------------------|-------------------------------------------------|
| 1.          | C12 Sphingosyl PE (d17:1)  | 3.982E+00                                       |
| 2.          | PC 31:1 (17:0/14:1)        | 2.214E+00                                       |
| 3.          | PI 31:1 (17:0/14:1)        | 1.862E+00                                       |
| 4.          | PE 31:1 (17:1/14:0)        | 2.141E+00                                       |
| 5.          | 1,2,3-Triheptad TAG (17:0) | 3.109E+00                                       |
| 6.          | C17 Ceramide (d18:1/17:0)  | 5.205E+00                                       |
| 7.          | 16:0 Diether PE            | 3.578E+00                                       |
| 8.          | PS (17:0/14:1)             | 1.473E+00                                       |

**Supplementary Table 3.** Gene specific primers used for quantitative RT-PCR analysis

| <b>Gene</b>     | <b>CG number</b> | <b>Forward Primer (5')</b> | <b>Reverse Primer (3')</b> |
|-----------------|------------------|----------------------------|----------------------------|
| <i>rp49</i>     | <i>CG7939</i>    | CGGATCGATATGCTAAGCTG<br>T  | GCGCTTGTTTCGATCCGTA        |
| Gastric Lipases | <i>CG31089</i>   | GCACTAATGTCTTGGATTCC<br>CG | CACTTTCACACACTGGAC<br>GCA  |
|                 | <i>CG31091</i>   | CTGGATACGATGTTTGGCTG<br>G  | GTGCCTTGGGAGTGTCCT<br>AT   |
|                 | <i>CG8093</i>    | AAAGACACGCCAGCAAGTC<br>G   | GGAGCGAGCAAATGAGC<br>AGA   |
|                 | <i>CG6271</i>    | ACAAGCCCAACAAGCGTCT<br>G   | CTCGTAGTCTCCGCACTT<br>CA   |
|                 | <i>CG5932</i>    | GCAGCACGGATTGTTTCAGTA<br>A | CTGTTTCAGCGAGATGATG<br>ATG |
|                 | <i>CG17192</i>   | GCTGGTAAGCAAGTTGGGC<br>A   | CATCCTGGTTGTTTCCGTC<br>C   |
|                 | <i>CG6295</i>    | AACCCTGGGATTCCTGAAGC       | ATGTAGGCATTGGTGGTG<br>GC   |
|                 | <i>CG6283</i>    | GGTGGCAAGGTTGGTGAGA<br>T   | CATCGGTGGATAGACGCT<br>TAG  |
